# Supplementary material for: Phenotypic proteomic profiling identifies a landscape of targets for circadian clock–modulating compounds
Source: PubMed Central journal article supplement (PMC6892409; doi:10.26508/lsa.201900603), 2019-12-02
Supplement: LSA-2019-00603_review_history.pdf [file LSA-2019-00603_review_history.pdf]

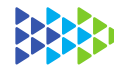

## Proteomic Profiling Identifies a Landscape of Targets for Circadian Clock Modulating Compounds

Sandipan Ray, Radoslaw Lach, Kate J. Heesom, Utham K. Valekunja, Vesela Encheva, Ambrosius P. Snijders, and Akhilesh B. Reddy  
**DOI: 10.26508/lsa.201900603**

*Corresponding author(s): Dr. Akhilesh Reddy (University of Pennsylvania)*

---

### Review timeline:

---

|                     |            |
|---------------------|------------|
| Submission Date:    | 2019-11-08 |
| Editorial Decision: | 2019-11-08 |
| Revision Received:  | 2019-11-18 |
| Editorial Decision: | 2019-11-18 |
| Revision Received:  | 2019-11-19 |
| Accepted:           | 2019-11-19 |

---

Scientific Editor: Andrea Leibfried

### Transaction Report:

(Note: With the exception of the correction of typographical or spelling errors that could be a source of ambiguity, letters and reports are not edited. The original formatting of letters and referee reports may not be reflected in this compilation.)

Please note that the manuscript was previously reviewed at another journal and the reports were taken into account in the decision-making process at Life Science Alliance.

No Peer Review Process File is available with this article, as the authors have chosen not to make the review process public in this case.

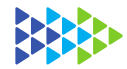

1st Editorial Decision

08 November 2019

Re: Life Science Alliance manuscript #LSA-2019-00603-T

Prof Akhliesh Reddy  
The Francis Crick Institute  
London

Dear Dr. Reddy,

Thank you for transferring your manuscript entitled "Phenotypic Proteomic Profiling Identifies a Landscape of Targets for Circadian Clock Modulating Compounds" to Life Science Alliance. The manuscript was assessed by expert reviewers at another journal before, and the editors transferred those reports to us with your permission.

The reviewers who evaluated your work at the other journal appreciated the quality of the data, but would have expected a broader conceptual advance. Lack thereof does not preclude publication in Life Science Alliance in this case, and we would thus like to invite you to submit a revised version for publication here.

Please provide a point-by-point response to the concerns raised and introduce text changes in your manuscript accordingly. The following editorial points should get addressed, too:

- Please link your profile in our submission system to your ORCID iD, you should have received an email with instructions on how to do so
- Please provide a short summary blurb about your work in our submission system and fill in the other mandatory fields
- Please upload all figure files (including supplementary figures) as separate files and without legends, the latter should only remain in / get added to the manuscript word docx file
- Please make sure that all figures are easily readable - Parts of the PPP graph in figure 1 are a bit blurry and figure S10 is really dense at the moment and could perhaps be split into two suppl figures (note that all figures, including suppl. Figures will be displayed in-line in the HTML version of your paper)

To upload the revised version of your manuscript, please log in to your account: <https://lsa.msubmit.net/cgi-bin/main.plex>  
You will be guided to complete the submission of your revised manuscript and to fill in all necessary information. Please get in touch in case you do not know or remember your login name.

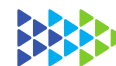

Thank you for this interesting contribution to Life Science Alliance. We are looking forward to receiving your revised manuscript.

Sincerely,

Andrea Leibfried, PhD  
Executive Editor  
Life Science Alliance  
Meyershofstr. 1  
69117 Heidelberg, Germany  
t +49 6221 8891 502  
e a.leibfried@life-science-alliance.org  
www.life-science-alliance.org

-----  
**A. THESE ITEMS ARE REQUIRED FOR REVISIONS**

- A letter addressing the reviewers' comments point by point.
- An editable version of the final text (.DOC or .DOCX) is needed for copyediting (no PDFs).
- High-resolution figure, supplementary figure and video files uploaded as individual files: See our detailed guidelines for preparing your production-ready images, <http://www.life-science-alliance.org/authors>
- Summary blurb (enter in submission system): A short text summarizing in a single sentence the study (max. 200 characters including spaces). This text is used in conjunction with the titles of papers, hence should be informative and complementary to the title and running title. It should describe the context and significance of the findings for a general readership; it should be written in the present tense and refer to the work in the third person. Author names should not be mentioned.

**B. MANUSCRIPT ORGANIZATION AND FORMATTING:**

Full guidelines are available on our Instructions for Authors page, <http://www.life-science-alliance.org/authors>

We encourage our authors to provide original source data, particularly uncropped/-processed electrophoretic blots and spreadsheets for the main figures of the manuscript. If you would like to add source data, we would welcome one PDF/Excel-file per figure for this information. These files will be linked online as supplementary "Source Data" files.

**\*\*\*IMPORTANT:** It is Life Science Alliance policy that if requested, original data images must be made available. Failure to provide original images upon request will result in unavoidable delays in publication. Please ensure that you have access to all original microscopy and blot data images before submitting your revision.\*\*\*



RE: Life Science Alliance Manuscript #LSA-2019-00603-TR

Dr. Akhliesh Reddy  
University of Pennsylvania  
Smilow Center for Translational Research  
Philadelphia 19104

Dear Dr. Reddy,

Thank you for submitting your revised manuscript entitled "Proteomic Profiling Identifies a Landscape of Targets for Circadian Clock Modulating Compounds". I appreciate your response to the concerns raised and would be happy to publish your paper in Life Science Alliance.

Please still include a reference in the figure legend to either Fig 6B-D or S10-S12 that the same is shown as in the respective other figure.

If you are planning a press release on your work, please inform us immediately to allow informing our production team and scheduling a release date.

To upload the final version of your manuscript, please log in to your account: <https://lsa.msubmit.net/cgi-bin/main.plex>  
You will be guided to complete the submission of your revised manuscript and to fill in all necessary information. Please get in touch in case you do not know or remember your login name.

To avoid unnecessary delays in the acceptance and publication of your paper, please read the following information carefully.

#### A. FINAL FILES:

These items are required for acceptance.

-- An editable version of the final text (.DOC or .DOCX) is needed for copyediting (no PDFs).

-- High-resolution figure, supplementary figure and video files uploaded as individual files: See our detailed guidelines for preparing your production-ready images, <http://www.life-science-alliance.org/authors>

-- Summary blurb (enter in submission system): A short text summarizing in a single sentence the study (max. 200 characters including spaces). This text is used in conjunction with the titles of papers, hence should be informative and complementary to the title. It should describe the context and significance of the findings for a general readership; it should be written in the present tense and refer to the work in the third person. Author names should not be mentioned.

#### B. MANUSCRIPT ORGANIZATION AND FORMATTING:

Full guidelines are available on our Instructions for Authors page, <http://www.life-science-alliance.org/authors>

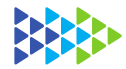

We encourage our authors to provide original source data, particularly uncropped/-processed electrophoretic blots and spreadsheets for the main figures of the manuscript. If you would like to add source data, we would welcome one PDF/Excel-file per figure for this information. These files will be linked online as supplementary "Source Data" files.

**\*\*Submission of a paper that does not conform to Life Science Alliance guidelines will delay the acceptance of your manuscript.\*\***

**\*\*It is Life Science Alliance policy that if requested, original data images must be made available to the editors. Failure to provide original images upon request will result in unavoidable delays in publication. Please ensure that you have access to all original data images prior to final submission.\*\***

**\*\*The license to publish form must be signed before your manuscript can be sent to production. A link to the electronic license to publish form will be sent to the corresponding author only. Please take a moment to check your funder requirements.\*\***

**\*\*Reviews, decision letters, and point-by-point responses associated with peer-review at Life Science Alliance will be published online, alongside the manuscript. If you do want to opt out of having the reviewer reports and your point-by-point responses displayed, please let us know immediately.\*\***

Thank you for your attention to these final processing requirements. Please revise and format the manuscript and upload materials within 7 days.

Thank you for this interesting contribution, we look forward to publishing your paper in Life Science Alliance.

Sincerely,

Andrea Leibfried, PhD  
Executive Editor  
Life Science Alliance  
Meyershofstr. 1  
69117 Heidelberg, Germany  
t +49 6221 8891 502  
e a.leibfried@life-science-alliance.org  
www.life-science-alliance.org

-----

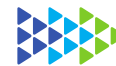

3<sup>rd</sup> Editorial Decision

19 November 2019

RE: Life Science Alliance Manuscript #LSA-2019-00603-TRR

Dr. Akhliesh Reddy  
University of Pennsylvania  
Smilow Center for Translational Research  
Philadelphia 19104

Dear Dr. Reddy,

Thank you for submitting your Research Article entitled "Proteomic Profiling Identifies a Landscape of Targets for Circadian Clock Modulating Compounds". It is a pleasure to let you know that your manuscript is now accepted for publication in Life Science Alliance. Congratulations on this interesting work.

The final published version of your manuscript will be deposited by us to PubMed Central upon online publication.

Your manuscript will now progress through copyediting and proofing. It is journal policy that authors provide original data upon request.

Reviews, decision letters, and point-by-point responses associated with peer-review at Life Science Alliance will be published online, alongside the manuscript. If you do want to opt out of having the reviewer reports and your point-by-point responses displayed, please let us know immediately.

**\*\*\*IMPORTANT:** If you will be unreachable at any time, please provide us with the email address of an alternate author. Failure to respond to routine queries may lead to unavoidable delays in publication.\*\*\*

Scheduling details will be available from our production department. You will receive proofs shortly before the publication date. Only essential corrections can be made at the proof stage so if there are any minor final changes you wish to make to the manuscript, please let the journal office know now.

**DISTRIBUTION OF MATERIALS:**

Authors are required to distribute freely any materials used in experiments published in Life Science Alliance. Authors are encouraged to deposit materials used in their studies to the appropriate repositories for distribution to researchers.

You can contact the journal office with any questions, [contact@life-science-alliance.org](mailto:contact@life-science-alliance.org)

Again, congratulations on a very nice paper. I hope you found the review process to be constructive and are pleased with how the manuscript was handled editorially. We look forward to future exciting submissions from your lab.

Sincerely,

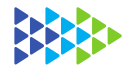

Andrea Leibfried, PhD  
Executive Editor  
Life Science Alliance  
Meyerhofstr. 1  
69117 Heidelberg, Germany  
t +49 6221 8891 502  
e [a.leibfried@life-science-alliance.org](mailto:a.leibfried@life-science-alliance.org)  
[www.life-science-alliance.org](http://www.life-science-alliance.org)
